# Supplementary material for: Cost-effectiveness of diagnostic and therapeutic interventions for chronic hepatitis C: a systematic review of model-based analyses
Source: Springer Nature journal article supplement (doi:10.1186/s12874-018-0515-9), 2018-06-12
Supplement: MOESM1 [file 12874_2018_515_MOESM1_ESM.pdf]

**Additional file 1: Search Strategies.**

| Database                           | Hits |
|------------------------------------|------|
| MEDLINE and MEDLINE in Process     | 1231 |
| EMBASE                             | 2071 |
| NHS EEDs (The Cochrane Library)    | 403  |
| HTA Library (The Cochrane Library) | 28   |
| Lilacs                             | 25   |
| Total                              | 3758 |
| -duplicates                        | 1355 |
| unique studies to screen           | 2403 |

**Database(s):** Ovid MEDLINE(R) In-Process & Other Non-Indexed Citations and Ovid MEDLINE(R)

**Host:** OVID

**Data Parameters:** 1946 to Present

**Date Searched:** 12/05/2015

**Information Specialist:** CC

**Searcher:** RC(Press Checked: HP)

| # | Searches                                                                                                                                                                                                                                                                            | Results |
|---|-------------------------------------------------------------------------------------------------------------------------------------------------------------------------------------------------------------------------------------------------------------------------------------|---------|
| 1 | exp Hepatitis C/                                                                                                                                                                                                                                                                    | 50119   |
| 2 | (hepatitis c or Hepatitis C or hepacivir\$ or (chronic adj3 hepatitis)).ti,ab,kw,ot.                                                                                                                                                                                                | 81035   |
| 3 | 1 or 2                                                                                                                                                                                                                                                                              | 90939   |
| 4 | ((economic adj3 evaluat\$) or (cost\$ adj3 (utility or decision or benefit or model or effect\$ or minimisation or minimization)) or (CBA or CEA or CUA) or DAM or (decision adj3 (model\$ or analytic or tree)) or (model based or model-based) or Pharmacoeconomics).ti,ab,kw,ot. | 171572  |
| 5 | exp *decision support techniques/                                                                                                                                                                                                                                                   | 18667   |
| 6 | 4 or 5                                                                                                                                                                                                                                                                              | 188299  |
| 7 | 3 and 6                                                                                                                                                                                                                                                                             | 1231    |

**Host:** OVID

**Data Parameters:** 1974 to 2015 May 11

**Date Searched:** 12/05/2015

**Information Specialist:** CC

**Searcher:** RC (Press Checked: HP)

**Database(s):** Embase 1974 to 2015 May 11

| # | Searches                                                                             | Results |
|---|--------------------------------------------------------------------------------------|---------|
| 1 | exp hepatitis C/                                                                     | 79621   |
| 2 | (hepatitis c or Hepatitis C or hepacivir\$ or (chronic adj3 hepatitis)).ti,ab,kw,ot. | 112761  |
| 3 | 1 or 2                                                                               | 132467  |

| # | Searches                                                                                                                                                                                                                                                                            | Results |
|---|-------------------------------------------------------------------------------------------------------------------------------------------------------------------------------------------------------------------------------------------------------------------------------------|---------|
| 4 | ((economic adj3 evaluat\$) or (cost\$ adj3 (utility or decision or benefit or model or effect\$ or minimisation or minimization)) or (CBA or CEA or CUA) or DAM or (decision adj3 (model\$ or analytic or tree)) or (model based or model-based) or Pharmacoeconomics).ti,ab,kw,ot. | 225980  |
| 5 | *decision support system/                                                                                                                                                                                                                                                           | 7652    |
| 6 | 4 or 5                                                                                                                                                                                                                                                                              | 232730  |
| 7 | 3 and 6                                                                                                                                                                                                                                                                             | 2071    |

**NHS Economic Evaluation Database: Issue 1 of 4, January 2015**

**Search Name:**

**Date Run:** 24/03/15 16:59:42.455

**Description:** Technology Assessments (n = 28) / Economic Evaluations (n = 403)

**Information Specialist:** CC

**Searcher:** RC (Press Checked: HP)

| #  | Searches                                                                                                                                                                                                                                                                 | Results |
|----|--------------------------------------------------------------------------------------------------------------------------------------------------------------------------------------------------------------------------------------------------------------------------|---------|
| #1 | MeSH descriptor: [Hepatitis C] explode all trees                                                                                                                                                                                                                         | 2338    |
| #2 | (hepatitis c or Hepatitis C or hepacivir* or (chronic near/2 hepatitis))                                                                                                                                                                                                 | 9401    |
| #3 | #1 or #2                                                                                                                                                                                                                                                                 | 9401    |
| #4 | ((economic near/2 evaluat*) or (cost* near/2 (utility or decision or benefit or model or effect* or minimisation or minimization)) or (CBA or CEA or CUA) or DAM or (decision near/2 (model* or analytic or tree)) or (model based or model-based) or Pharmacoeconomics) | 52320   |
| #5 | MeSH descriptor: [Decision Support Techniques] this term only                                                                                                                                                                                                            | 1611    |
| #6 | #4 or #5                                                                                                                                                                                                                                                                 | 52672   |
| #7 | #3 and #6                                                                                                                                                                                                                                                                | 1206    |

**Database(s):** Lilacs

**Data Parameters:** 1998 to 2014

**Date Searched:** 12/05/2015

**Information Specialist:** CC

**Searcher:** RC (Press Checked: HP)

**Search Strategy:** Lilacs (n = 25)

tw:("Hepatitis C" AND (((economic adj3 evaluat\*) OR (cost\* adj3 (utility OR decision OR benefit OR model OR effect\* OR minimisation OR minimization)) OR (cba OR cea OR cua) OR dam OR (decision adj3 (model\* OR analytic OR tree)) OR (model based OR model-based) OR pharmacoeconomics))) AND ( db:("LILACS"))
